# Supplementary material for: CYR61 and TAZ Upregulation and Focal Epithelial to Mesenchymal Transition May Be Early Predictors of Barrett’s Esophagus Malignant Progression
Source: PubMed Central journal article supplement (PMC5008832; doi:10.1371/journal.pone.0161967), 2016-09-01
Supplement: pone.0161967.s002.pdf [file pone.0161967.s002.pdf]

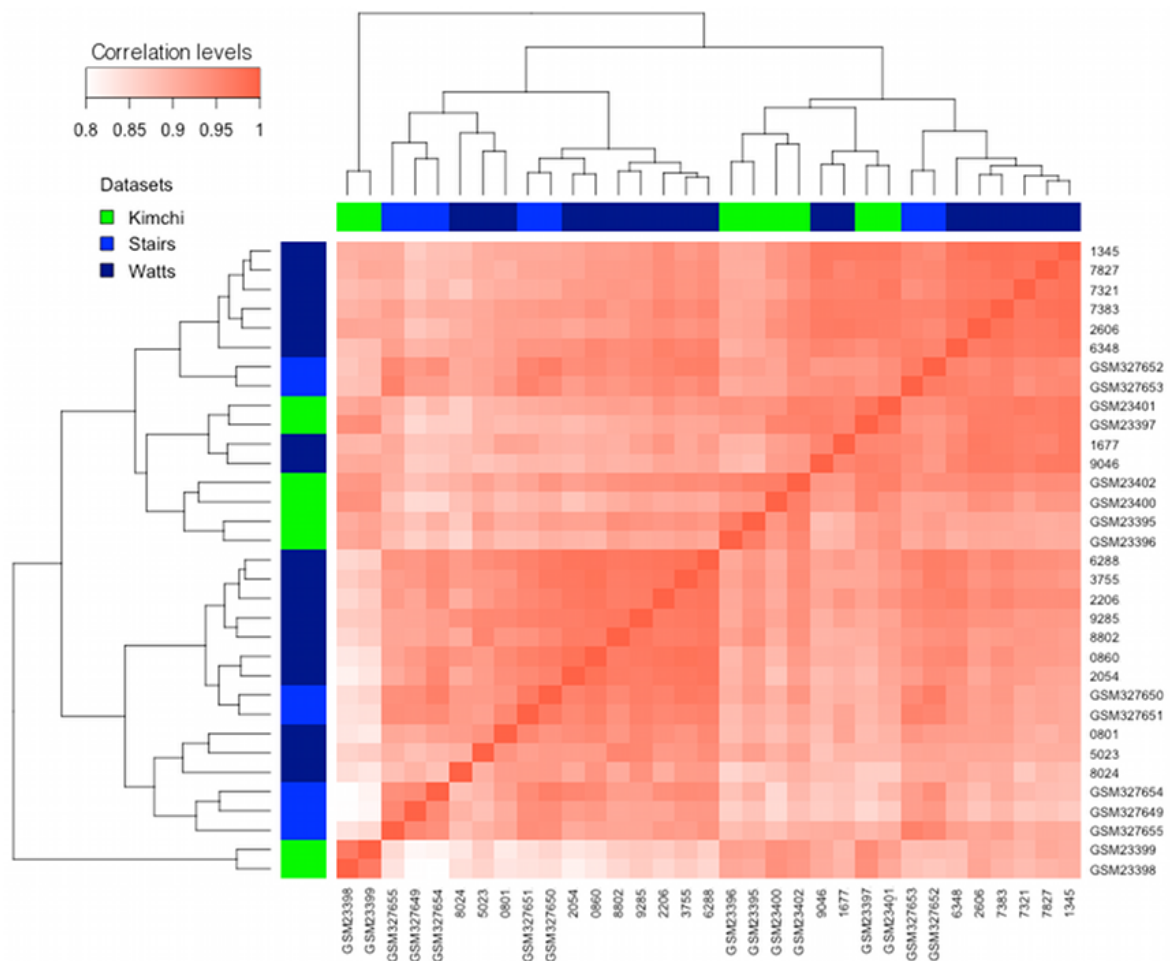

**S2 Fig. Microarray data of BE samples from distinct datasets is highly correlated.** Pearson's correlations plotted in the heatmap were calculated using fRMA normalized absolute intensity levels and samples were compared through pairwise comparison of all 33 BE samples. Each dataset is represented with a different colour in the coloured side bars.
