# Supplementary material for: CYR61 and TAZ Upregulation and Focal Epithelial to Mesenchymal Transition May Be Early Predictors of Barrett’s Esophagus Malignant Progression
Source: PubMed Central journal article supplement (PMC5008832; doi:10.1371/journal.pone.0161967), 2016-09-01
Supplement: pone.0161967.s004.pdf [file pone.0161967.s004.pdf]

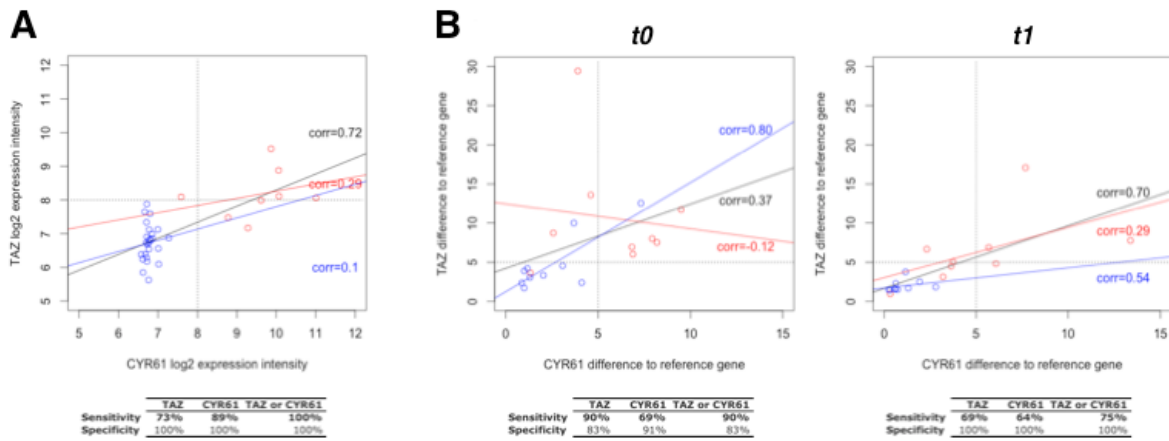

**S4 Fig. CYR61 and TAZ expression levels are not correlated.** **A.** Microarray data correlation of CYR61 and TAZ log<sub>2</sub> expression intensities. **B.** Correlation of RT-qPCR relative expression levels of CYR61 and TAZ in the index biopsies (*t0*) and in the recent samples (*t1*). Results related with P-BE and nonP-BE samples are represented in red and blue, respectively. Black represents results with all samples. A preliminary overview of sensitivity and specificity values for individual or combined usage of biomarkers of at risk BE is shown below each plot.
