# Supplementary material for: CYR61 and TAZ Upregulation and Focal Epithelial to Mesenchymal Transition May Be Early Predictors of Barrett’s Esophagus Malignant Progression
Source: PubMed Central journal article supplement (PMC5008832; doi:10.1371/journal.pone.0161967), 2016-09-01
Supplement: pone.0161967.s006.pdf [file pone.0161967.s006.pdf]

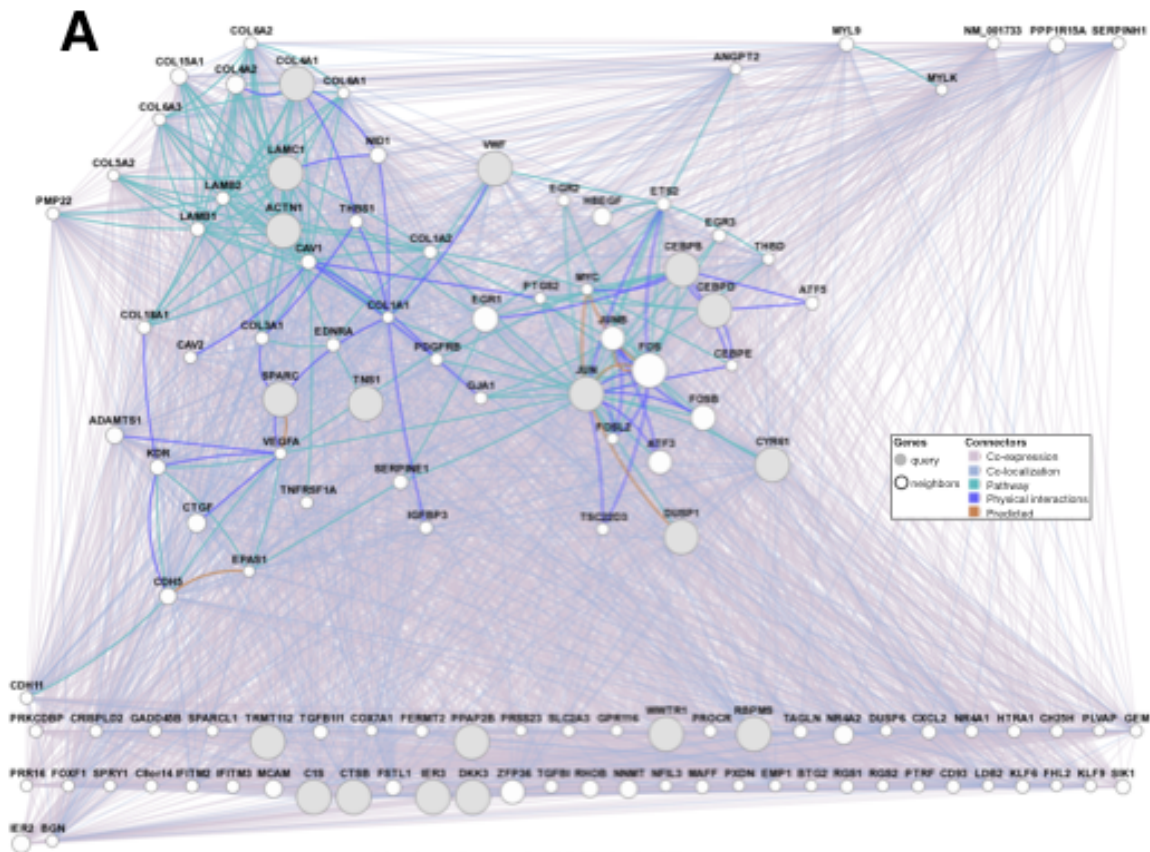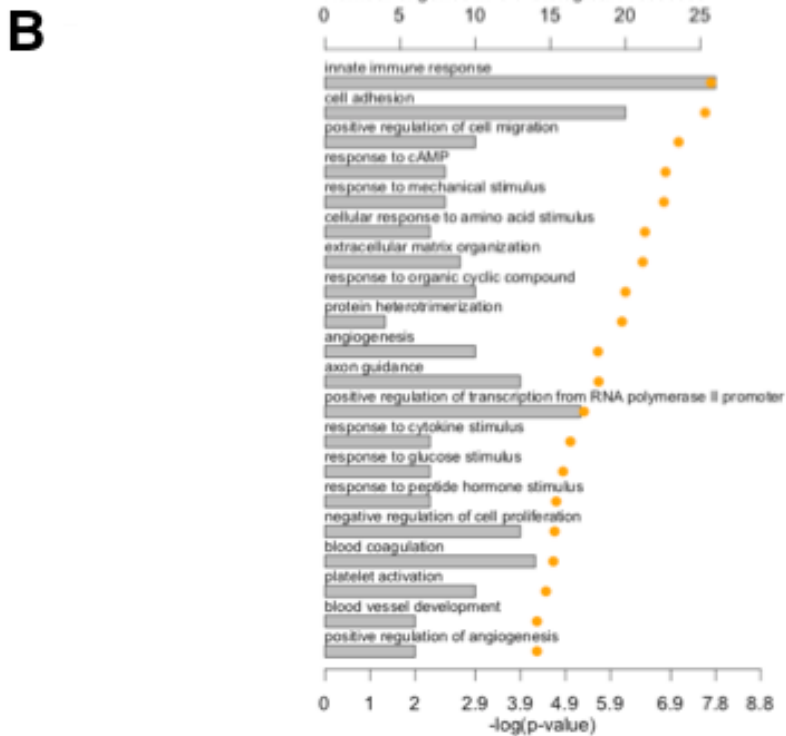

S6 Fig. GeneMania network of the 19 selected candidate biomarkers, network neighbors and associated function showed an enrichment of genes related with cell adhesion, motility and response to stimuli. A. The set of 19 genes was used to find

connections with close neighbors according to GeneMania association network algorithm. **B.** Top 20 significant ( $q\text{-value} < 0.05$ ) GO Biological Processes were identified by gene set enrichment analysis performed with InnateDB tool. Yellow dots illustrate the adjusted Ps for each GO category.
