# Supplementary material for: CYR61 and TAZ Upregulation and Focal Epithelial to Mesenchymal Transition May Be Early Predictors of Barrett’s Esophagus Malignant Progression
Source: PLOS journal article supplement (doi:10.1371/journal.pone.0161967), 2016-09-01
Supplement: S3 (10.1371/journal.pone.0161967.s003) [file journal.pone.0161967.s003]

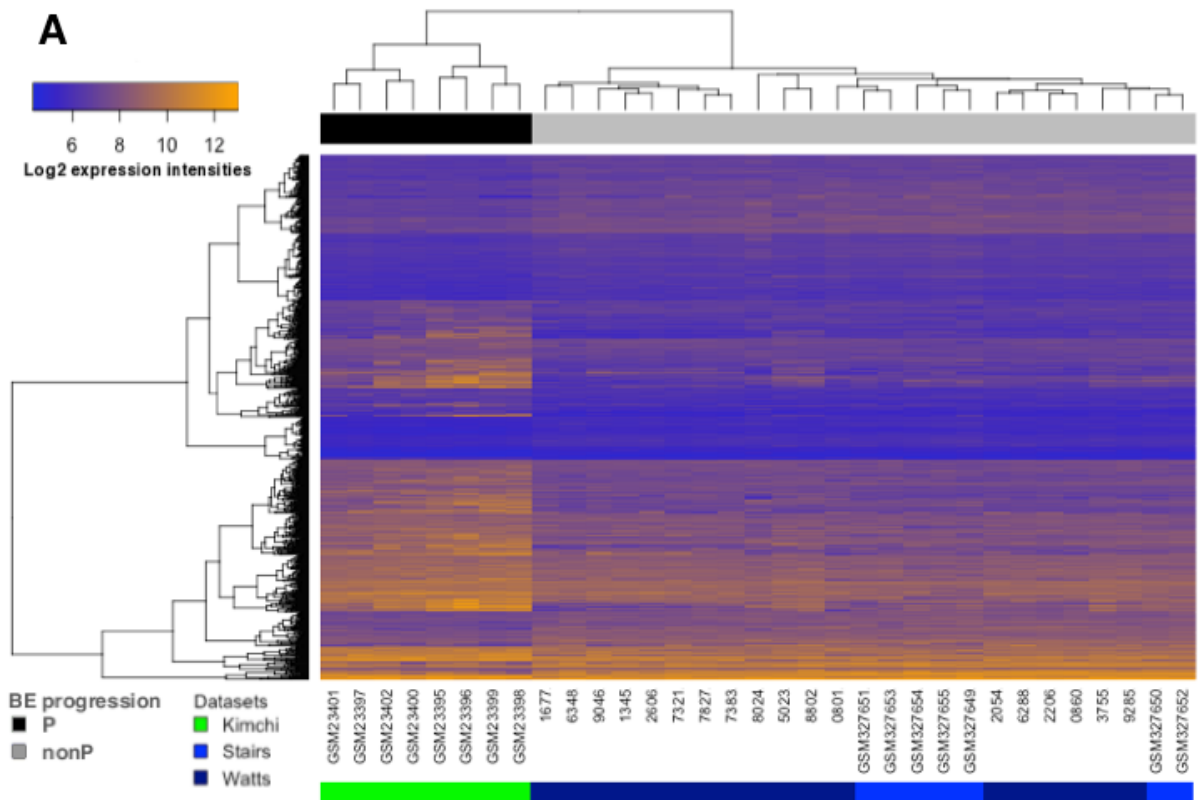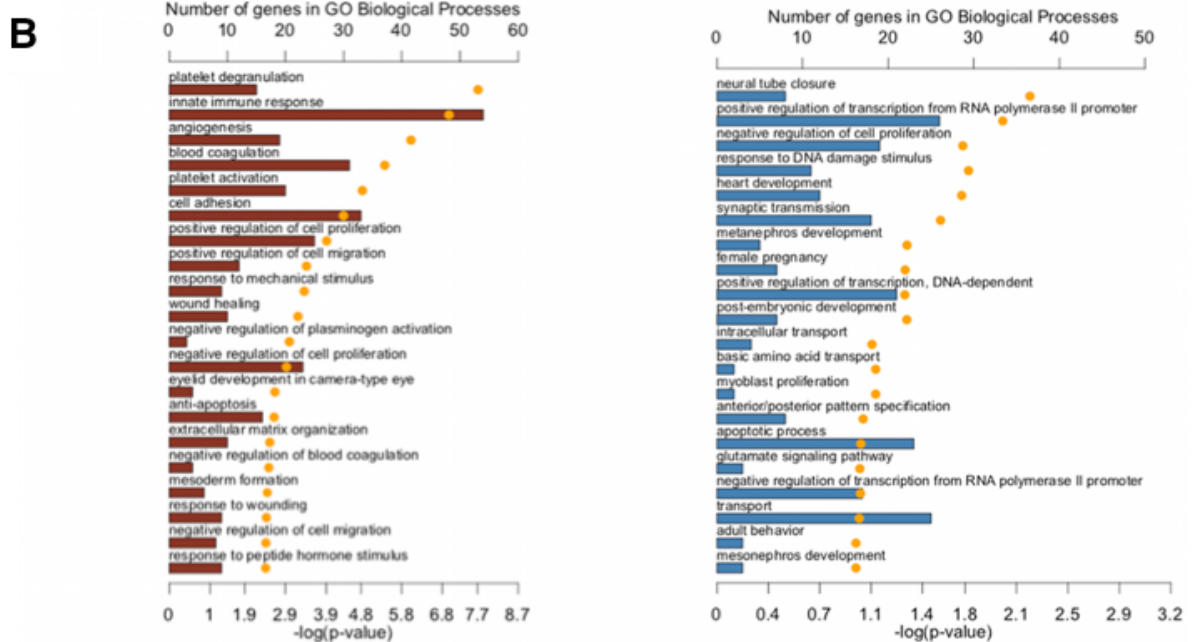

**S3 Fig. Differential expression analysis of P-BE and nonP-BE microarray data highlighted more than 700 genes potentially involved in BE malignant progression. A.** Heatmap of genes filtered after differential expression analysis with a conservative cutoff ( $Lods \geq 5$ ). Each dataset is represented with a different colour in the bottom coloured side bar

and each BE progression group is represented by the upper coloured bar (black and grey). **B.** Top 20 GO Biological Processes ( $q\text{-value} < 0.05$ ) over-represented among significantly up-regulated (left plot, in red) and down-regulated (right plot, in blue) genes. Yellow dots illustrate the adjusted Ps for each GO category.
